# Supplementary material for: (AEDPH3)·(8-OQH)·(H2O): a yellow supramolecular plaster with ammonia adsorption and ammonia-induced discoloration properties
Source: Royal Society of Chemistry journal article supplement (doi:10.1039/c3ce41940a), 2014-01-01
Supplement: c3ce41940a.pdf [file c3ce41940a.pdf]

Supporting information of

**(AEDPH<sub>3</sub>)·(8-OQH)·(H<sub>2</sub>O): A yellow supramolecular plaster with ammonia adsorption and ammonia-induced discoloration properties**

Di Tian,<sup>a</sup> Juan Xiong,<sup>a</sup> Xi-chao Liang,<sup>a</sup> Jing Deng,<sup>b</sup> Liang-jie Yuan,<sup>\*a</sup> Shuo-ping Chen,<sup>\*b</sup>

<sup>a</sup> College of Chemistry and Molecular Sciences, Wuhan University, Wuhan 430072, P. R. China. \*Corresponding author.

E-mail: ljyuan@whu.edu.cn. Tel: +86-27-6875-2800

<sup>b</sup> Key Lab of New Processing Technology for Nonferrous Metals & Materials, Ministry of Education, College of Materials Science and Engineering, Guangxi Scientific Experiment Center of Mining, Metallurgy and Environment, Guilin University of technology, Guilin 541004, P. R. China. \*Corresponding author. E-mail: chenshuoping\_777@163.com. Tel: +86-773-5896290

List:

Figure S-1. The schematic diagram of the color change between neutral 8-OQ molecule (left) and protonated 8-OQH<sup>+</sup> cation (right)..

Figure S-2. PXRD pattern of the plaster **1** and PXRD pattern of compound **1** which is calculated by the single crystal data.

Figure S-3. The TG (black) and DSC (red) curves of plaster **1**.

Figure S-4. IR spectrum of plaster **1**.

Figure S-5. <sup>1</sup>H NMR spectrum of 8-OQ extracted from the equimolar mixture of plaster **1** and ammonia.

Figure S-6. <sup>13</sup>C NMR spectrum of 8-OQ extracted from the equimolar mixture of plaster **1** and ammonia.

Table S-7. Hydrogen bonds of plaster **1** (Å and °).

**Figure S-1.** The schematic diagram of the color change between neutral 8-OQ molecule (left) and protonated 8-OQH<sup>+</sup> cation (right).

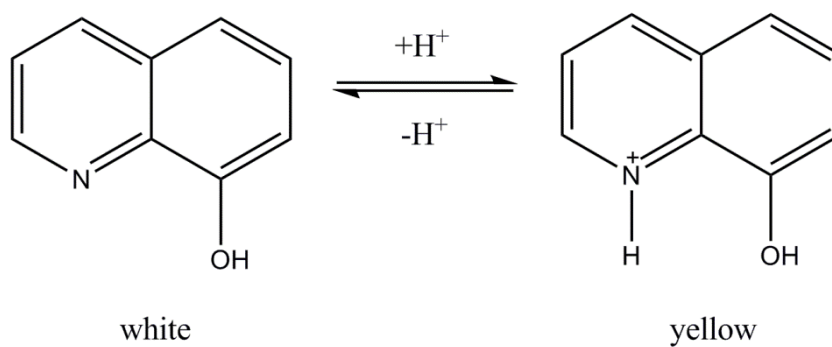

**Figure S-2.** PXRD pattern of the plaster **1** and PXRD pattern of compound **1** which is calculated by the single crystal data.

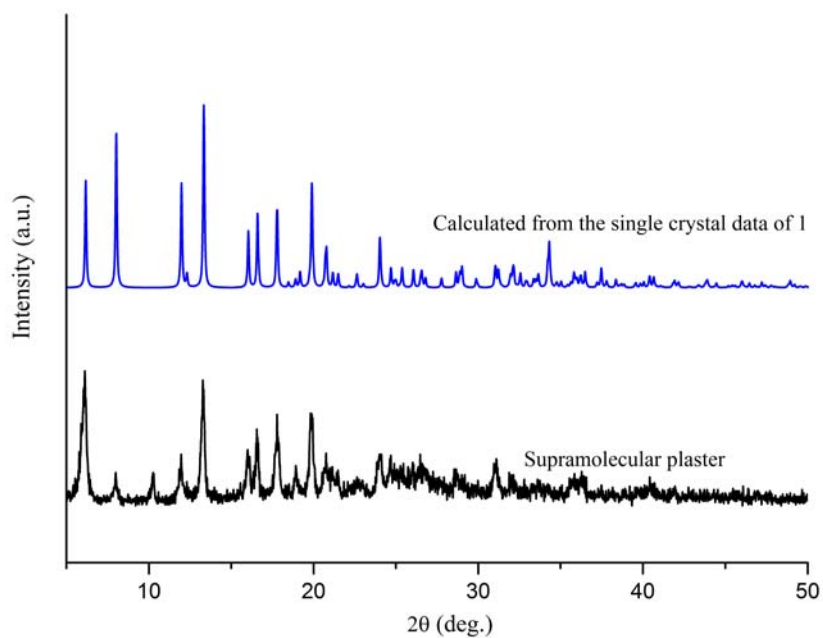

**Figure S-3.** The TG (black) and DSC (red) curves of plaster **1**. The plaster can be stable up to 120 °C in nitrogen. Then, it decomposes until 250 °C, attributed to the release of water molecules and the decomposition of 8-OQH<sup>+</sup> ions. The weight loss occurring between 244°C and 800 °C corresponds to the decomposition of AEDPH<sub>3</sub><sup>-</sup> ions. The final product in 800 °C is probably assumed to be 0.5 (P<sub>2</sub>O<sub>3</sub>+P<sub>2</sub>O<sub>5</sub>), and the observed total weight loss (65.67 %) is similar to the calculated value (65.03%).

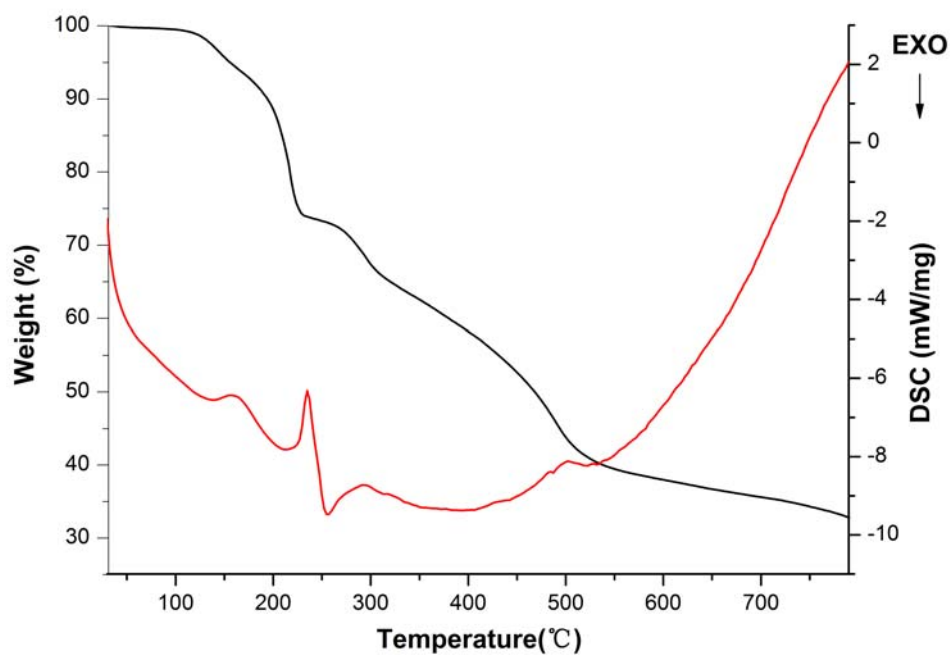

**Figure S-4.** IR spectrum of plaster **1**.

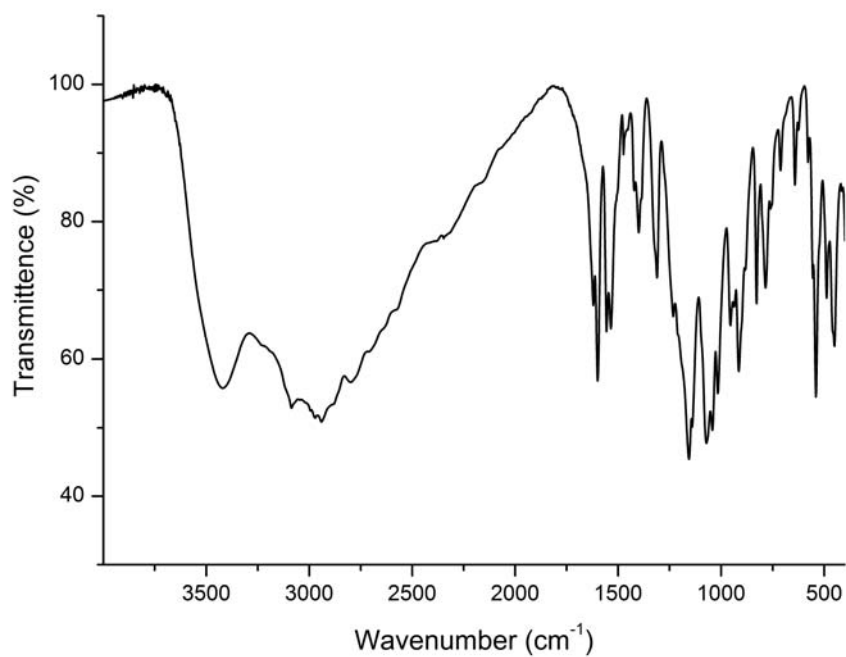

**Figure S-5.** <sup>1</sup>H NMR spectrum of 8-OQ extracted from the equimolar mixture of plaster **1** and ammonia.

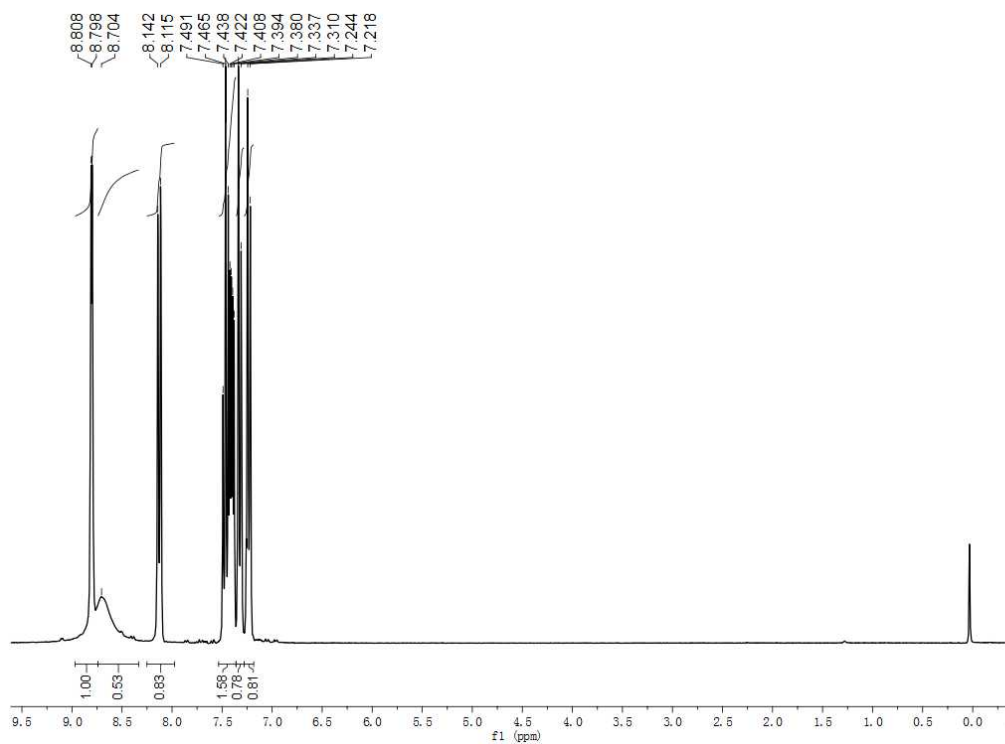

**Figure S-6.**  $^{13}\text{C}$  NMR spectrum of 8-OQ extracted from the equimolar mixture of plaster **1** and ammonia.

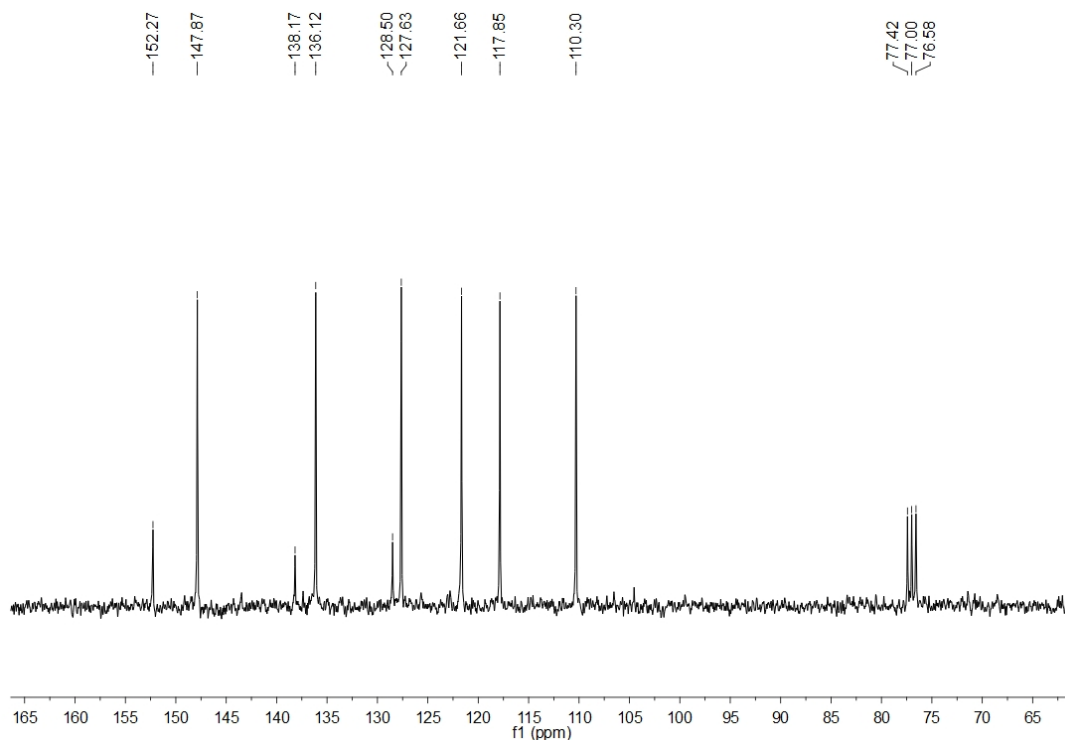

**Table S-7.** Hydrogen bonds of plaster **1** (Å and °).

| Donor-H...Acceptor  | D(Donor...Acceptor) | <( Donor-H...Acceptor) |
|---------------------|---------------------|------------------------|
| O(7)-H(7A)...O(2)   | 2.760(11)           | 119.6                  |
| O(7)-H(7B)...O(1)#1 | 2.790(11)           | 178.2                  |
| O(8)-H(8)...O(7)#2  | 2.410(12)           | 177.7                  |
| O(6)-H(6A)...O(5)#3 | 2.549(7)            | 127.5                  |
| O(3)-H(3A)...O(4)#4 | 2.584(8)            | 179.7                  |
| N(1)-H(1C)...O(6)#1 | 2.854(8)            | 144.3                  |
| N(1)-H(1B)...O(4)#5 | 2.839(7)            | 139.2                  |
| N(1)-H(1A)...O(1)#1 | 2.753(8)            | 158.5                  |
| N(2)-H(2)...O(2)    | 2.662(18)           | 141(24)                |
| N(2)-H(2)...O(8)    | 2.74(2)             | 111(21)                |

Symmetry transformations used to generate equivalent atoms: #1 x,y,z-1; #2 -x+1,-y+1,-z+1; #3 x,-y+1/2,z+1/2; #4 -x,-y+1,-z+2; #5 -x,-y+1,-z+1.
